# Supplementary material
Source: PubMed Central journal article supplement (PMC6715376)
Supplement: jci-129-123778-s075.pdf [file jci-129-123778-s075.pdf]

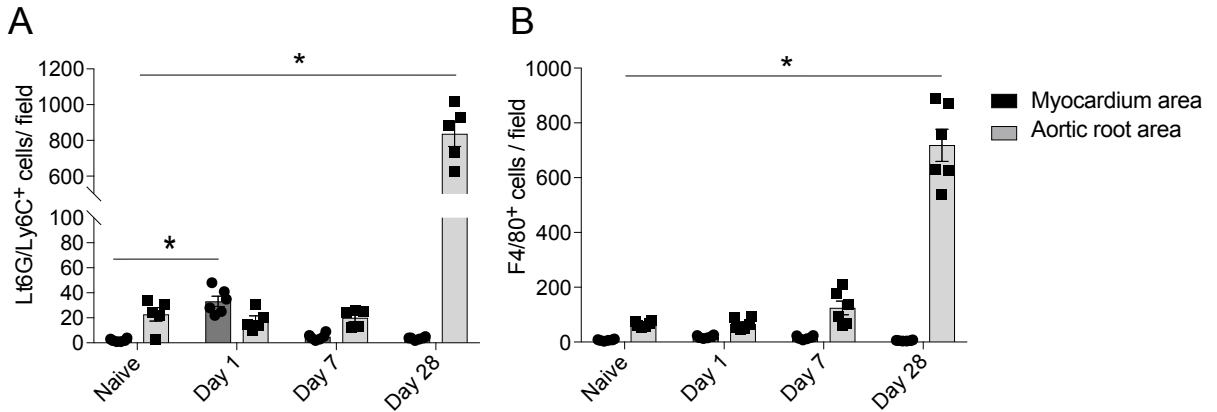

**Supplemental Figure 1. Temporal and spacial distribution of inflammatory cells in the heart.** Hearts were isolated from naive or CAWS-injected WT mice (on day 1, 7 or 28) and stained with anti-Ly6G/Ly6C or F4/80 for IHC. The number of Ly6G/Ly6C-positive cells (**A**) or F4/80-positive cells (**B**) was counted in high-power fields (600  $\mu$ m x 600  $\mu$ m) in myocardium area or aortic root area (mean  $\pm$  SEM, n= 3 mice per group, cell number of 2 fields are counted in each area of the mice, \*, p< 0.001 versus naive in each area). Scale bars in the low-power field, 1 mm; Scale bars in the high-power field, 100  $\mu$ m. All p values were calculated using unpaired two-tailed Student's t test.

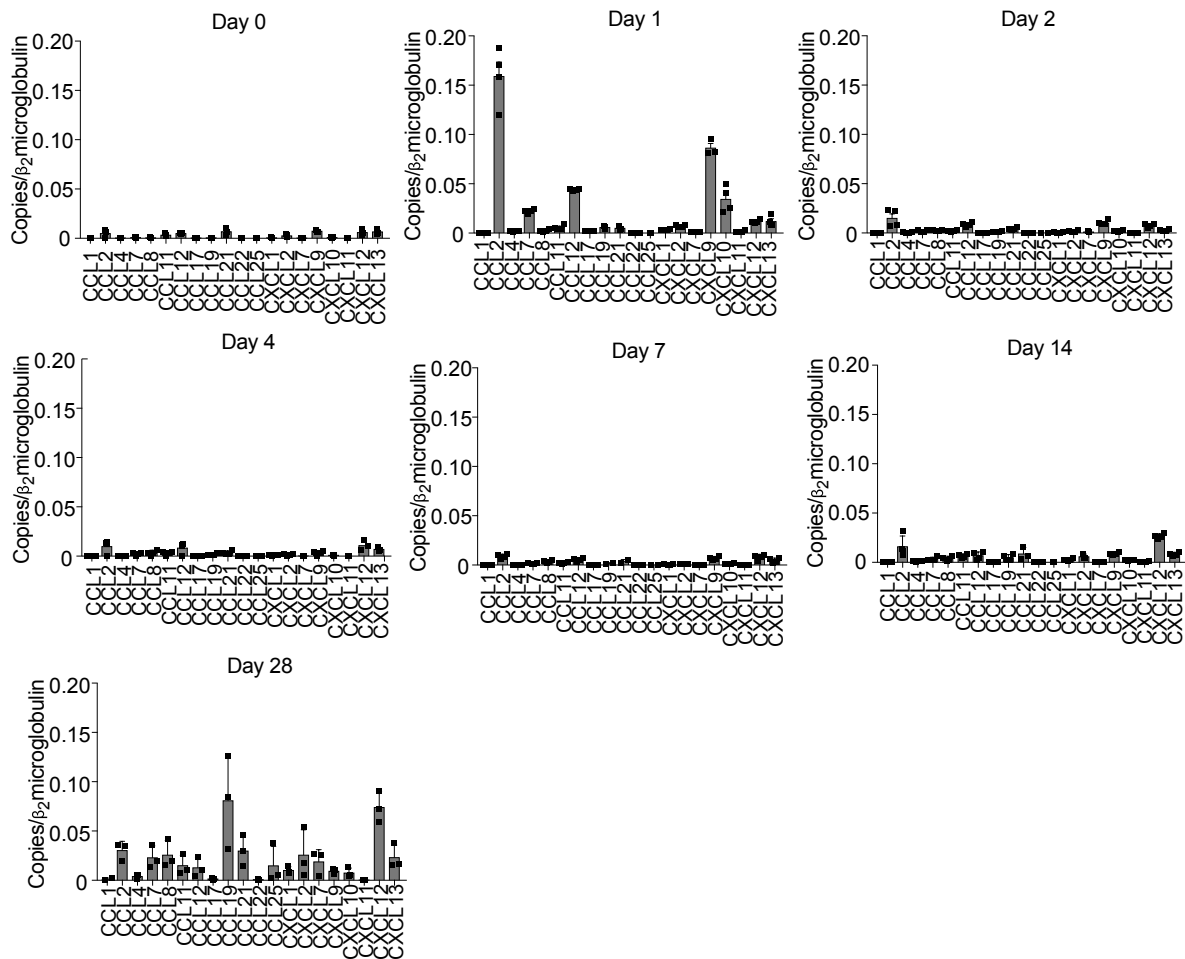

**Supplemental Figure 2. Chemokines levels in the heart over the course of CAWS-induced vasculitis.** Real-time qPCR analysis for chemokine levels on RNA isolated from heart tissue on day 1, 2, 4, 7, 14, 21 and 28 after CAWS injection (mean ± SEM, n = 3-4 per group).

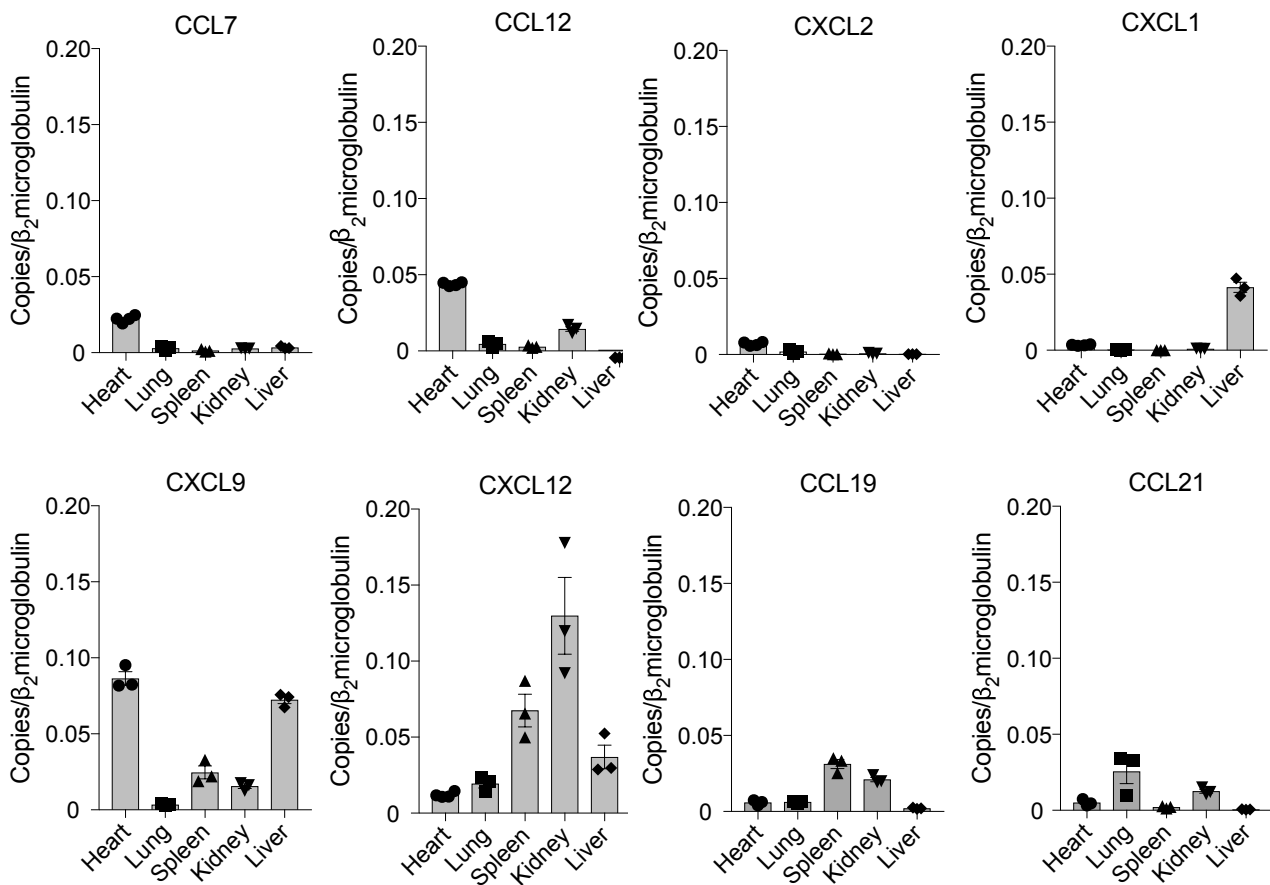

**Supplemental Figure 3. Chemokine levels in various organs day 1 after CAWS**

**injection.** Wild type mice were injected with CAWS and 1 day later, heart, lung, spleen, kidney and liver were harvested and assessed for chemokine RNA levels by qPCR (mean  $\pm$  SEM, n = 3-4).

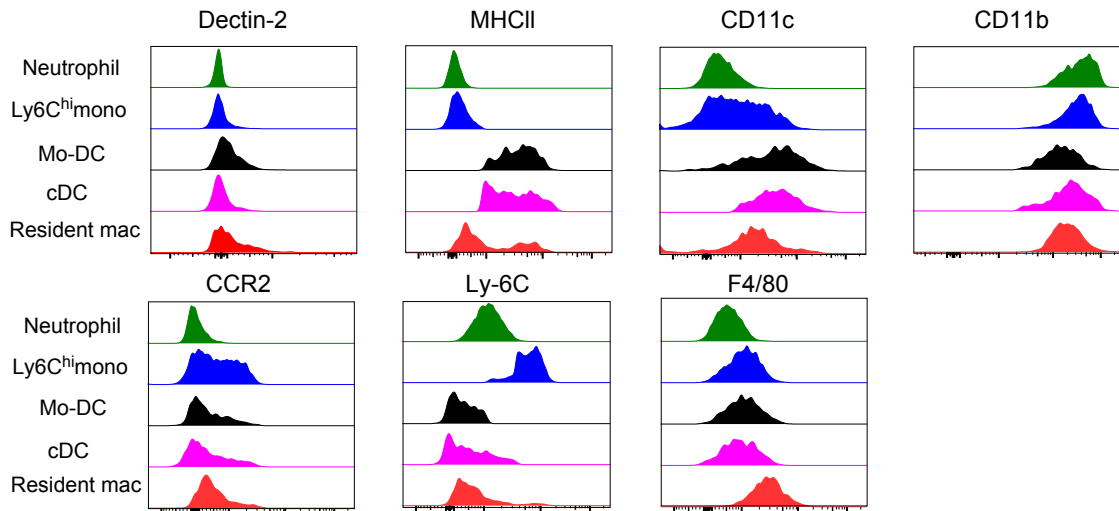

**Supplemental Figure 4. Phenotype of myeloid subsets recovered from WT hearts day 1 after CAWS injection.** Representative histograms of cardiac cell population labeled with antibodies to Dectin-2, MHC-II, CD11c, CD11b, CCR2, Ly6C and F4/80. The data is one representative of 3 independent experiments.



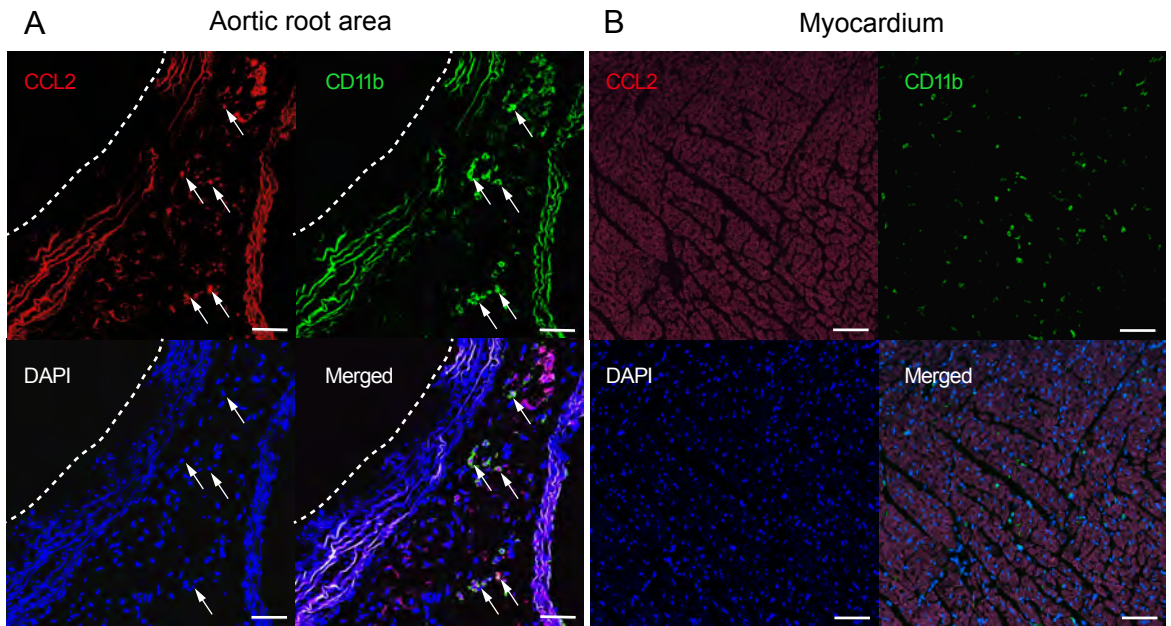

**Supplemental Figure 5. CCL2 is preferentially produced by CD11b+ cells in the aortic root compared to the myocardium following i.p. CAWS injection.**

(A) Aortic root area or (B) myocardium isolated from *Ccl2-RFP<sup>fl/fl</sup>* reporter mice on day 1 after CAWS injection was stained for CD11b (green) and analyzed by confocal microscopy. Arrows indicate co-localization (yellow) of CD11b (green) with CCL2 (red). Scale bars= 50  $\mu$ m.

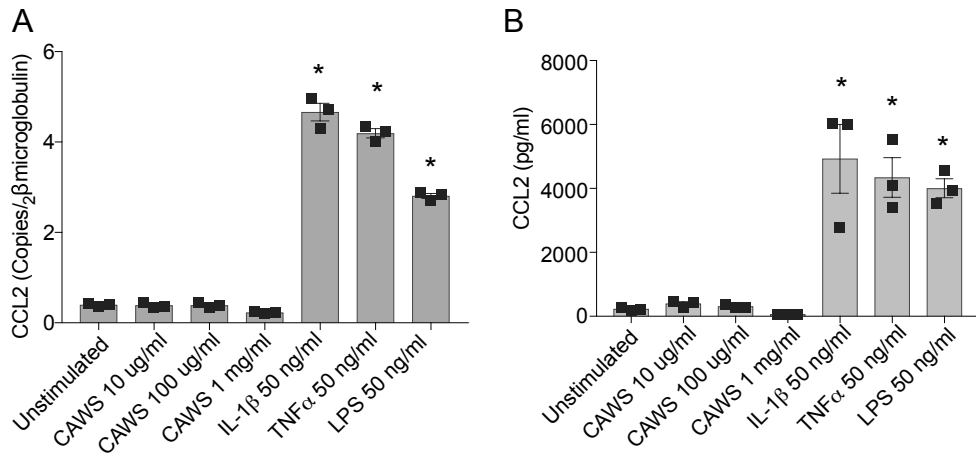

**Supplemental Figure 6. Cardiac fibroblasts did not produce CCL2 in response to CAWS stimulation.** Primary mouse cardiac fibroblasts were stimulated with IL-1 $\beta$ , TNF $\alpha$ , LPS, or CAWS for 18 hours. **(A)** CCL2 RNA levels were assessed by qPCR and **(B)** protein release by ELISA (mean  $\pm$  SEM, n=3, \*, p< 0.0001 versus Unstimulated). All p values were calculated using unpaired two-tailed Student's t test.

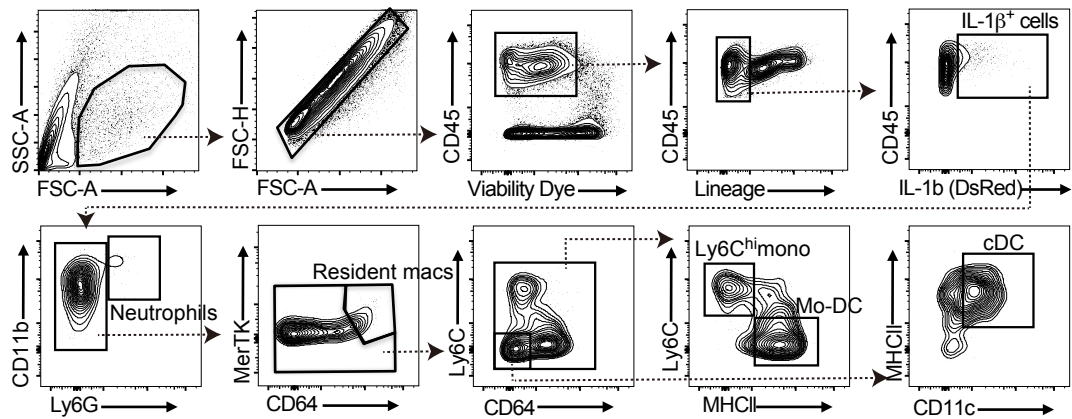

**Supplemental Figure 7. Flow cytometric gating strategy for single cell suspensions isolated from the hearts of *pIL1-DsRed* transgenic mice.** Representative contour plots of DsRed<sup>+</sup> IL-1β-expressing cells derived from WT or *pIL1-DsRed* transgenic hearts 7 days after CAWS injection. One representative of 3 independent experiments.

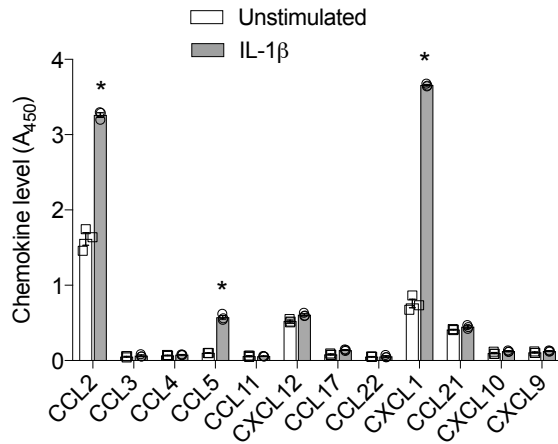

**Supplemental Figure 8. Cardiac fibroblasts secrete chemokine proteins following stimulation with IL-1b.** Mouse cardiac fibroblasts were stimulated with IL-1b (20 ng/ml) for 18 hours and chemokine protein levels in the culture supernatant were measured by ELISA (mean $\pm$  SEM, n = 3, \*, p < 0.0001 versus Unstimulated). All p values were calculated using unpaired two-tailed Student's t test.

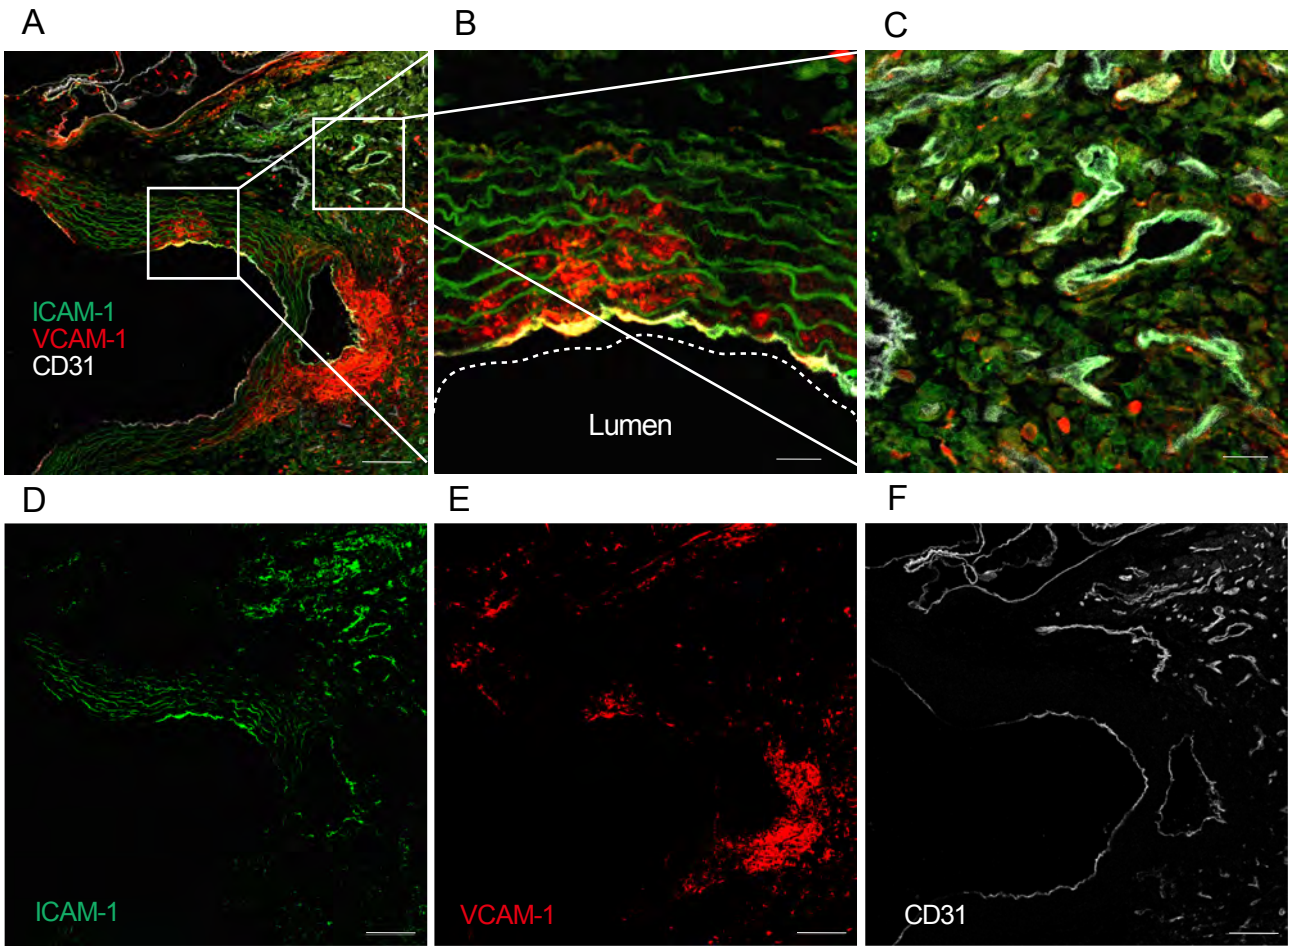

**Supplemental Figure 9. ICAM-1 and VCAM-1 expression in the aortic root area of the heart on day 28 after CAWS injection.** (A-F) Sections of heart tissue were stained with ICAM-1, VCAM-1 and CD31. **A**, ICAM-1; **B**, VCAM-1; **C**, CD31; **D**, Merged image of A-C; **E**, luminal endothelium; **F**, adventitial area. Green autofluorescent elastic fibers in the medial wall. Scale bars= 100 μm.

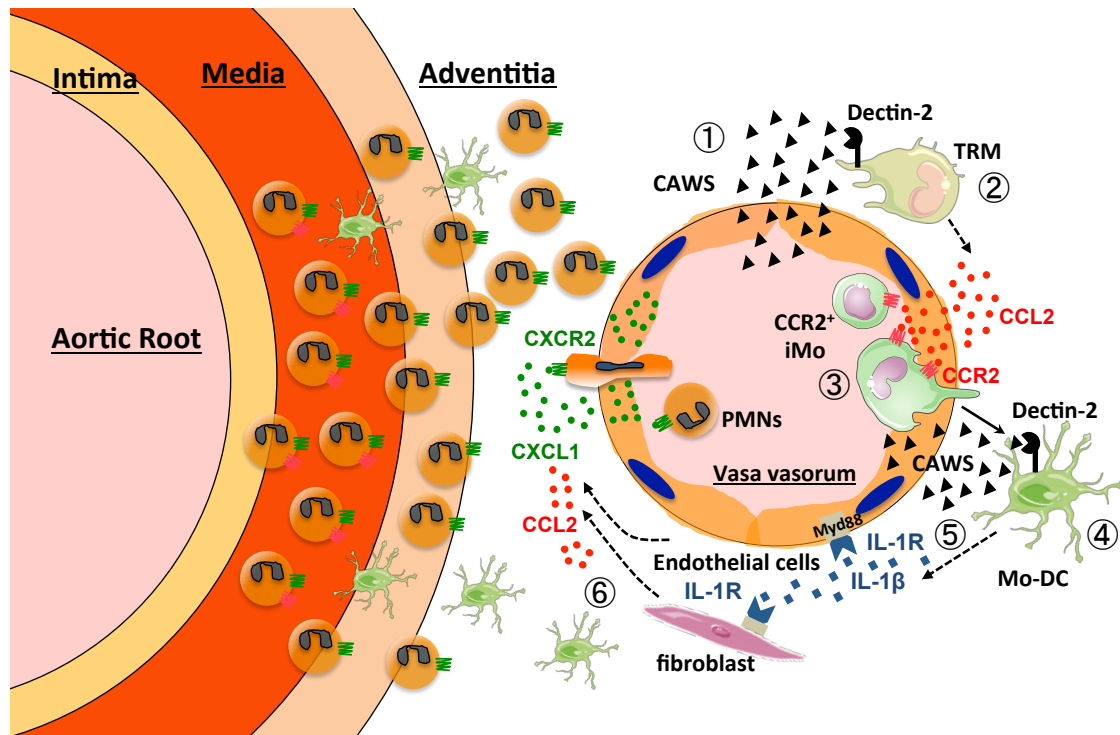

**Supplemental Figure 10. CAWS induces Dectin-2-dependent CCL2 production in tissue resident macrophages in the aortic root and coronary arteries initiating arteritis.** ① Deposition of CAWS in the adventitia of the aortic root on day 1; ② CAWS activates Dectin-2 on tissue resident macrophages (TRM) to release CCL2; ③ CCL2 induces the recruitment of CCR2<sup>+</sup> inflammatory monocytes (iMo) into the adventitia; ④ iMo differentiate into monocyte derived-dendritic cells (Mo-DC) in the adventitia; ⑤ CAWS activates Dectin-2 on Mo-DC to release IL-1 $\beta$ ; ⑥ IL-1 $\beta$  activates endothelial cells and fibroblasts in the adventitia to release CXCL1 and CCL2, which recruit neutrophils (PMN) and iMo, respectively, into the adventitia driving and amplifying vascular inflammation.

**Supplemental Table 1.**

| <b>ANTIBODIES</b>    | <b>SOURCE</b>             | <b>Clone</b> |
|----------------------|---------------------------|--------------|
| CD11b-BV510          | BioLegend                 | M1/70        |
| CD11c-BV605          | BioLegend                 | N418         |
| CD31-Pacific Blue    | BioLegend                 | 390          |
| CD45-FITC            | BioLegend                 | 30-F11       |
| CD45-BV711           | BioLegend                 | 30-F11       |
| CD45.1-FITC          | BioLegend                 | A20          |
| CD45.2-APC           | BioLegend                 | 104          |
| I-A/I-E-PerCP/Cy5.5  | BioLegend                 | M5/114.15.2  |
| CD62P-PE             | BioLegend                 | RMP-1        |
| CD64-PE/Cy7          | BioLegend                 | X54-5/7.1    |
| CD90.2-APC           | BioLegend                 | Thy1.2       |
| CD106-PE             | BioLegend                 | 429          |
| CD106-AF488          | BioLegend                 | 429          |
| CD172a-APC           | BioLegend                 | P84          |
| F4/80-BV650          | BioLegend                 | BM8          |
| Ly6C-BV421           | BioLegend                 | HK1.4        |
| Ly6G-BV786           | BioLegend                 | 1A8          |
| XCR1-BV421           | BioLegend                 | ZET          |
| MERTK-FITC           | BioLegend                 | 2B10C42      |
| CD11b-Biotin         | BioLegend                 | M1/70        |
| CD11c-Biotin         | BioLegend                 | N418         |
| CD19-BUV395          | BD Biosciences            | 1D3          |
| Thy1.1-BUV395        | BD Biosciences            | 53-2.1       |
| NK1.1-BUV395         | BD Biosciences            | PK136        |
| CD54-PE              | BD Biosciences            | 3E2          |
| CD62E-PE             | BD Biosciences            | 10E9.6       |
| Ly6G-PE              | BD Biosciences            | 1A8          |
| Streptavidin-FITC    | BD Biosciences            | N/A          |
| CCR2-AF700           | R&D Systems               | 475301       |
| CCR2-PE              | R&D Systems               | 475301       |
| MERTK-APC            | R&D Systems               | 108928       |
| Dectin-2-APC         | R&D Systems               | N/A          |
| polyclonal Goat IgG  | R&D Systems               | N/A          |
| CD24-PE              | eBioscience               | 30-F1        |
| gp38-PE/Cy7          | eBioscience               | 8.1.1        |
| Purified F4/80       | Cell Signaling Technology | N/A          |
| Purified Ly-6G/Ly-6C | Novus Biologicals         | RB6-8C5      |
| Purified Dectin-2    | Bio-Rad                   | D2.11E4      |
| Anti-rat IgG-AF488   | Invitrogen                | N/A          |

**Supplemental Table 2.**

| <b>Probe</b>  | <b>Forward</b>                  | <b>Reverse</b>                  |
|---------------|---------------------------------|---------------------------------|
| <i>Ccl1</i>   | AAG ATG GGC TCC TCC TGT CC      | TTG AGG CGC AGC TTT CTC TAC     |
| <i>Ccl2</i>   | TTA AAA ACC TGG ATC GGA ACC AA  | GCA TTA GCT TCA GAT TTA CGG G   |
| <i>Ccl4</i>   | TCT TGC TCG TGG CTG CCT         | GGG AGG GTC AGA GCC CA          |
| <i>Ccl7</i>   | GCT GCT TTC AGC ATC CAA GTG     | CCA GGG ACA CCG ACT ACTG        |
| <i>Ccl8</i>   | CGC AGT GCT TCT TTG CCT G       | TCT GGC CCA GTC AGC TTC TC      |
| <i>Ccl11</i>  | TCC ACA GCG CTT CTA TTC CTG     | GGA GCC TGG GTG AGC CA          |
| <i>Ccl12</i>  | GCT GGA CCA GAT GCG GTG         | CCG GAC GTG AAT CTT CTG CT      |
| <i>Ccl17</i>  | CAG GGA TGC CAT CGT GTT TC      | CAC CAA TCT GAT GGC CTT CTT     |
| <i>Ccl19</i>  | ATG CGG AAG ACT GCT GCC         | CGG AAG GCT TTC ACG ATG TT      |
| <i>Ccl21</i>  | TCC CGG CAA TCC TGT TCT T       | CCT TCC TCA GGG TTT GCA CA      |
| <i>Ccl22</i>  | TAC ATC CGT CAC CCT CTG CC      | CGG TTA TCA AAA CAA CGC CAG     |
| <i>Ccl25</i>  | GCC TGG TTG CCT GTT TTG TT      | CAG CAG TCT TCA AAG GCA CCT     |
| <i>Cxcl1</i>  | CTG GGA TTC ACC TCA AGA ACA TC  | CAG GGT CAA GGC AAG CCT C       |
| <i>Cxcl2</i>  | CCA ACC ACC AGG CTA CAG G       | GCG TCA CAC TCA AGC TCT G       |
| <i>Cxcl5</i>  | TGC GTT GTG TTT GCT TAA CCG     | AGC TAT GAC TTC CAC CGT AGG     |
| <i>Cxcl7</i>  | CTC AGA CCT ACA TCG TCC TGC     | GTG GCT ATC ACT TCC ACA TCA G   |
| <i>Cxcl9</i>  | AAT GCA CGA TGC TCC TGC A       | AGG TCT TTG AGG GAT TTG TAG TGG |
| <i>Cxcl10</i> | GCC GTC ATT TTC TGC CTC A       | CGT CCT TGC GAG AGG GAT C       |
| <i>Cxcl11</i> | AAT TTA CCC GAG TAA CGG CTG     | ATT ATG AGG CGA GCT TGC TTG     |
| <i>Cxcl12</i> | AAA CCA GTC AGC CTG AGC TAC C   | GGC TCT GGC GAT GTG GC          |
| <i>Cxcl13</i> | CTC TCC AGG CCA CGG TAT TCT     | CCG ACA ACA GTT GAA ATC ACT CC  |
| <i>Ccr1</i>   | ACC TTC GGC AGC TGT TTC A       | TCC ACA GAG AGG AAG GGC AG      |
| <i>Ccr2</i>   | TTA AAA ACC TGG ATC GGA ACC AA  | GCA TTA GCT TCA GAT TTA CGG G   |
| <i>Cxcr2</i>  | ATG CCC TCT ATT CTG CCA GAT     | GTG CTC CGG TTG TAT AAG ATG AC  |
| <i>Il1b</i>   | ACC TGT CCT GTG TAA TGA AAG ACG | TGG GTA TTG CTT GGG ATC CA      |
